# Supplementary material for: Comparison of Healthiness, Labelling, and Price between Private and Branded Label Packaged Foods in New Zealand (2015–2019)
Source: MDPI journal article supplement (doi:10.3390/nu13082731), 2021-08-09
Supplement: s1 [file s1]

**Table S1.** Description and number of products assessed by food category from 2015-2019 (overall and by private and branded label).

| Food category                   | Type of products included in category                                                                                                                                                                                                                                                                                                                                                                                                                                                                                                                                           | Number of products included |     |      |
|---------------------------------|---------------------------------------------------------------------------------------------------------------------------------------------------------------------------------------------------------------------------------------------------------------------------------------------------------------------------------------------------------------------------------------------------------------------------------------------------------------------------------------------------------------------------------------------------------------------------------|-----------------------------|-----|------|
|                                 |                                                                                                                                                                                                                                                                                                                                                                                                                                                                                                                                                                                 | Total                       | PL  | BL   |
| Bread and bakery products       |                                                                                                                                                                                                                                                                                                                                                                                                                                                                                                                                                                                 |                             |     |      |
| Savoury biscuits                | (L3): Plain dry biscuits - (L4): Other gluten-free crackers and crispbread; Other plain dry biscuits; Rice cakes and similar products (plain); Rice crackers (plain); Wheat-based crackers (e.g. water crackers); Wheat-based crispbread (e.g. Salada).<br>(L3): Savoury biscuits - (L4): Breadsticks; Flavoured rice cakes and corn cakes; Flavoured rice crackers; Other savoury crackers; Wheat-based flavoured crackers and crispbread.                                                                                                                                     | 1623                        | 276 | 1347 |
| Sweet biscuits                  | (L3): Gluten-free sweet biscuits.<br>(L3): Sweet filled biscuits - (L4): Chocolate-covered sandwich style biscuits (e.g. Tim Tam); Fruit filled biscuits; Jam filled biscuits; Other sweet filled biscuits; Anzac style biscuits; Choc-chip biscuits; Chocolate coated biscuits.<br>(L3): Sweet unfilled biscuits - (L4): Fruit and nut chunks biscuits; Gingerbread biscuits; Iced biscuits; Oatmeal/wheatmeal biscuits; Other sweet unfilled biscuits; Plain sweet unfilled biscuits; Shortbread style biscuits.                                                              | 2102                        | 375 | 1727 |
| Everyday sliced breads          | (L3): Mixed grain bread - (L4): Gluten free grain breads; Mixed grain sourdough; Multigrain bread; Other grain breads; Rye bread; Soy & linseed bread.<br>(L3): White bread.<br>(L3): Wholemeal bread.                                                                                                                                                                                                                                                                                                                                                                          | 657                         | 109 | 548  |
| Other breads                    | (L3): Flat bread - (L4): Gluten-free flat bread; Naan; Pita bread; Regular flat bread; Roti; Tortillas; Pizza bases.<br>(L3): Other bread - (L4): Bagels; English muffins; Gluten-free bread; Other plain bread; Other savoury bread; Savoury bread rolls.                                                                                                                                                                                                                                                                                                                      | 1325                        | 259 | 1066 |
| Cakes and muffins: ready-to-eat | (L3): Cakes: Bavarians; Brownies; Carrot cakes; Cheesecakes; Chocolate cakes, cupcakes; Doughnuts; Fruit cakes; Other cakes; Pancakes; Swiss rolls; Vanilla/plain cakes.<br>(L3): Muffins - (L4): Chocolate/choc-chip muffins; Fruit-based muffins; Other sweet muffins.                                                                                                                                                                                                                                                                                                        | 568                         | 120 | 448  |
| Cereal and cereal products      |                                                                                                                                                                                                                                                                                                                                                                                                                                                                                                                                                                                 |                             |     |      |
| Breakfast cereals: ready-to-eat | (L3): Ready-to-eat - (L4): Brans (excludes unprocessed ones); Flakes; Granola/cluster cereals; Muesli; Puffed cereals; Sweet cereals.<br>(L3): Ready-to-eat - (L4): Flakes - (L5): Cornflakes; Flakes with additions; Other plain flakes.<br>(L3): Ready-to-eat - (L4): Muesli - (L5): Muesli with fruit; Plain muesli.<br>(L3): Ready-to-eat - (L4): Puffed cereals - (L5): Cocoa pop style cereal; Other puffed cereals; Rice bubbles.<br>(L3): Ready-to-eat - (L4): Sweet cereals - (L5): Cocoa-based; Fruit-loop style; Nutri-Grain style cereal; Other sweet style cereal. | 1506                        | 221 | 1285 |
| Cereal bars                     | (L3): Ready-to-eat - (L4) Breakfast biscuits.<br>(L3): Cereal-based bars - (L4): Baked/filled bars; Chocolate-coated cereal-based bars; Muffin bars; Plain cereal-based bars; Snack logs; Variety packs cereal and nut bars; Yoghurt-coated cereal-based bars.                                                                                                                                                                                                                                                                                                                  | 1050                        | 190 | 860  |

|                                           |                                                                                                                                                                                                                                                                                                                                                                                                              |      |     |      |
|-------------------------------------------|--------------------------------------------------------------------------------------------------------------------------------------------------------------------------------------------------------------------------------------------------------------------------------------------------------------------------------------------------------------------------------------------------------------|------|-----|------|
|                                           | (L3): Nut-based bars - (L4): Chocolate-coated nut-based bars; Plain nut-based bars; Yoghurt-coated nut-based bars.<br>(L3): Puff-based bars.                                                                                                                                                                                                                                                                 |      |     |      |
| <b>Dairy</b>                              |                                                                                                                                                                                                                                                                                                                                                                                                              |      |     |      |
| Ice cream                                 | (L3): Ice-cream - (L4): Vanilla ice cream; Other sweet-based ice cream; Other chocolate-based ice cream; Ice cream stick - choc coated; ice cream cups; Ice cream cones (e.g. Cornetto); ice cream cakes; Fruit-flavoured ice cream; Chocolate ice cream.                                                                                                                                                    | 1612 | 140 | 1472 |
| <b>Fish and seafood products</b>          |                                                                                                                                                                                                                                                                                                                                                                                                              |      |     |      |
| Canned fish                               | (L3): Canned fish - (L4): Canned salmon - (L5): Plain canned salmon, Flavoured canned salmon; (L4): Canned tuna - (L5): Flavoured canned tuna, Plain canned tuna in oil, Plain canned tuna in water; (L4): Canned sardines - (L5): Plain canned sardines, Flavoured canned sardines; (L4): Other canned fish.                                                                                                | 1100 | 324 | 776  |
| <b>Fruit and vegetables</b>               |                                                                                                                                                                                                                                                                                                                                                                                                              |      |     |      |
| Fruit in syrup/juice                      | (L3): Fruit in juice/syrup - (L4): Pineapple in juice/syrup, Pears in juice/syrup, Peaches in juice/syrup, Apricot in juice/syrup, Other fruits in juice/syrup, Mixed fruits in juice/syrup.                                                                                                                                                                                                                 | 744  | 357 | 387  |
| Salted nuts                               | (L3): salted nuts - (L4): Seeds, Pistachios, Peanuts, Mixed nuts, Cashews, Almonds.                                                                                                                                                                                                                                                                                                                          | 487  | 154 | 333  |
| Vegetables-canned                         | (L3): Canned vegetables - (L4): Other canned vegetables, Canned tomatoes, Canned legumes, Canned corn, Canned beetroot, Canned asparagus, Baked beans.                                                                                                                                                                                                                                                       | 1306 | 332 | 974  |
| Vegetables-pickled                        | (L3): Pickled vegetables - (L4): Sundried tomatoes, Pickles/gherkins, Peppers/Capsicum, Other pickled vegetables, Onions, Olives, Capers, Artichokes.                                                                                                                                                                                                                                                        | 976  | 117 | 859  |
| <b>Meat and meat products (processed)</b> |                                                                                                                                                                                                                                                                                                                                                                                                              |      |     |      |
| Salamis, hams, bacon                      | (L3): Bacon.<br>(L3): Salami and cured meats - (L4): Salami, Polish Salami, Pancetta and prosciutto, Kransky, Chorizo, Cabanossi and twiggy sticks.<br>(L3): Sliced meat (excl salami and other cured meat) - (L4): Sliced Turkey, Slice Pork, Sliced meat Variety packs, Sliced Luncheon meat, Slice ham, Sliced chicken, Sliced beef.<br>(L3): Whole hams and similar products.                            | 1616 | 205 | 1411 |
| Sausages, hotdogs                         | (L3): Sausages and hotdogs - (L4): Sausages - (L5): Beef sausages, Chicken Sausages, Lamb sausages, Pork sausages, Other sausages. (L4): Hotdogs, Cocktail sausages.                                                                                                                                                                                                                                         | 760  | 153 | 607  |
| Raw or frozen meats with flavour/coated   | (L3): Frozen meat - (L4): Coated frozen meat.<br>(L3): Kebabs.<br>(L3): Meat burgers - (L4): Other meat burgers, Lamb meat burgers, Chicken burgers, beef burgers.<br>(L3): Other meat products (includes different types/varieties of seasoned/coated meats).<br>(L3): Raw flavoured meats - (L4): Raw flavoured turkey, Raw flavoured pork, Raw flavoured lamb, Raw flavoured chicken, Raw flavoured beef. | 972  | 177 | 795  |
| <b>Sauces and spreads</b>                 |                                                                                                                                                                                                                                                                                                                                                                                                              |      |     |      |
| Mayonnaise and salad dressings            | (L3): Mayonnaise.<br>(L3): Dressings - (L4): Other, French, Italian, Creamy, Balsamics.                                                                                                                                                                                                                                                                                                                      | 970  | 127 | 843  |
| Pasta sauces                              | (L3): Pasta sauces - (L4): Pesto; (L4): Fresh pasta sauces - (L5): Cream-based fresh pasta sauces, Tomato-based fresh pasta sauces; (L4): Ambient pasta sauces - (L5): Cream-based ambient pasta sauces, Pasta sauce with meat, Tomato-based ambient pasta sauces.                                                                                                                                           | 926  | 150 | 776  |

|                                           |                                                                                                                                                                                                                                                                       |        |       |        |
|-------------------------------------------|-----------------------------------------------------------------------------------------------------------------------------------------------------------------------------------------------------------------------------------------------------------------------|--------|-------|--------|
| Savoury spreads and dips                  | (L3): Savoury spreads - (L4): Relishes and pickles - (L5): Chutney, Pickles, Relishes; (L4): Other savoury spreads.                                                                                                                                                   | 1601   | 171   | 1430   |
| Peanut butter and other nut-based spreads | (L3): Dips - (L4): Salsa, Chilled dips.<br>(L3): Peanut butter - (L4): Smooth peanut butter, Crunchy peanut butter.<br>(L3): Other nut-based spreads.                                                                                                                 | 442    | 109   | 333    |
| <i>Snack foods</i>                        |                                                                                                                                                                                                                                                                       |        |       |        |
| Crisps and salty snacks                   | (L3): Salt and vinegar.<br>(L3): Pretzels.<br>(L3): Gluten-free corn chips.<br>(L3): Extruded snacks.<br>(L3): Corn chips.<br>(L3): Potato Crisps - (L4): Sweet chilli, Sour cream and chives, Plain, Other flavours, Chicken flavour, Cheese and onion, BBQ flavour. | 1241   | 200   | 1041   |
| <i>All products</i>                       |                                                                                                                                                                                                                                                                       |        |       |        |
| All products                              |                                                                                                                                                                                                                                                                       | 23,584 | 4,266 | 19,318 |

L3: Nutritrack level 3; L4: Nutritrack level 4; L5: Nutritrack level 5; PL: private labels; BL: branded labels.

**Table S2.** Number and proportion of products with missing information for sugar content, sodium content, estimated HSR and HSR displayed on front-of-pack-labelling from 2015-2019, by food category (overall).

| Food categories                           | Number of products in category | Missing information - N (%) |                  |               |                                |
|-------------------------------------------|--------------------------------|-----------------------------|------------------|---------------|--------------------------------|
|                                           |                                | Sugar (g/100 g)             | Sodium (mg/100g) | Estimated HSR | HSR displayed on front-of-pack |
| <i>Bread and bakery products</i>          |                                |                             |                  |               |                                |
| Savoury biscuits                          | 1623                           | 7 (0.4)                     | 14 (0.8)         | 19 (1.2)      | 0 (0.0)                        |
| Sweet biscuits                            | 2102                           | 61 (2.9)                    | 66 (3.1)         | 101 (4.8)     | 0 (0.0)                        |
| Everyday sliced breads                    | 657                            | 14 (2.1)                    | 18 (2.7)         | 20 (3.0)      | 0 (0.0)                        |
| Other breads                              | 1325                           | 11 (0.8)                    | 33 (2.5)         | 38 (2.9)      | 0 (0.0)                        |
| Cakes and muffins: ready-to-eat           | 568                            | 16 (2.8)                    | 19 (3.3)         | 28 (4.9)      | 0 (0.0)                        |
| <i>Cereal and cereal products</i>         |                                |                             |                  |               |                                |
| Breakfast cereals: ready-to-eat           | 1506                           | 10 (0.7)                    | 12 (0.8)         | 19 (1.3)      | 0 (0.0)                        |
| Cereal bars                               | 1050                           | 7 (0.5)                     | 7 (0.5)          | 13 (0.9)      | 0 (0.0)                        |
| <i>Dairy</i>                              |                                |                             |                  |               |                                |
| Ice-cream                                 | 1612                           | 9 (0.6)                     | --               | 17 (1.1)      | 0 (0.0)                        |
| <i>Fish and seafood products</i>          |                                |                             |                  |               |                                |
| Canned fish                               | 1100                           | --                          | 27 (2.5)         | 38 (3.5)      | 0 (0.0)                        |
| <i>Fruit and vegetables</i>               |                                |                             |                  |               |                                |
| Fruit in syrup/juice                      | 744                            | 3 (0.4)                     | --               | 13 (1.7)      | 0 (0.0)                        |
| Salted nuts                               | 487                            | --                          | 9 (1.8)          | 13 (2.7)      | 0 (0.0)                        |
| Vegetables - canned                       | 1306                           | --                          | 19 (1.5)         | 37 (2.8)      | 0 (0.0)                        |
| Vegetables - pickled                      | 976                            | --                          | 25 (2.6)         | 67 (6.9)      | 0 (0.0)                        |
| <i>Meat and meat products (processed)</i> |                                |                             |                  |               |                                |
| Salamis, hams, bacon                      | 1616                           | --                          | 17 (1.1)         | 26 (1.6)      | 0 (0.0)                        |
| Sausages, hotdogs                         | 760                            | --                          | 11 (1.4)         | 18 (2.4)      | 0 (0.0)                        |
| Raw or frozen meats with flavour/coated   | 972                            | --                          | 9 (0.9)          | 15 (1.5)      | 0 (0.0)                        |
| <i>Sauces and spreads</i>                 |                                |                             |                  |               |                                |
| Mayonnaise and salad dressings            | 970                            | 31 (3.2)                    | 14 (1.4)         | 56 (5.8)      | 0 (0.0)                        |
| Pasta sauces                              | 926                            | 16 (1.7)                    | 11 (1.2)         | 19 (2.1)      | 0 (0.0)                        |
| Savoury spreads and dips                  | 1601                           | 18 (1.1)                    | 16 (1.0)         | 27 (1.7)      | 0 (0.0)                        |
| Peanut butter and other nut-based spreads | 442                            | 4 (0.9)                     | 1 (0.2)          | 4 (0.9)       | 0 (0.0)                        |
| <i>Snack foods</i>                        |                                |                             |                  |               |                                |
| Crisps and salty snacks                   | 1241                           | --                          | 9 (0.7)          | 18 (1.5)      | 0 (0.0)                        |

HSR: Health Star Rating.

--Nutrient content not assessed as food category does not represent relevant source of the nutrient.

**Table S3.** Sodium content within the selected food categories: mean (SD) from 2015-2019- in total, for branded and private labels.

| Food categories                 | Sodium (mg/100 g) |               |      |               |      |               |      |               |      |               |                 |               |       |        |
|---------------------------------|-------------------|---------------|------|---------------|------|---------------|------|---------------|------|---------------|-----------------|---------------|-------|--------|
|                                 | 2015              |               | 2016 |               | 2017 |               | 2018 |               | 2019 |               | Total-2015-2019 |               |       |        |
|                                 | n                 | Mean (SD)     | n    | Mean (SD)     | n    | Mean (SD)     | n    | Mean (SD)     | n    | Mean (SD)     | n               | Mean (SD)     | Min   | Max    |
| Savoury biscuits                |                   |               |      |               |      |               |      |               |      |               |                 |               |       |        |
| Total                           | 307               | 678.5 (346.8) | 301  | 637.2 (304.4) | 313  | 647.0 (296.1) | 344  | 640.1 (272.3) | 345  | 616.1 (256.0) | 1609            | 642.6 (295.1) | 1.0   | 1770.0 |
| Branded labels                  | 259               | 707.6 (355.0) | 248  | 660.8 (308.4) | 252  | 660.1 (298.4) | 281  | 647.4 (274.9) | 295  | 624.6 (263.7) | 1334            | 658.4 (300.6) | 1.0   | 1770.0 |
| Private labels                  | 48                | 521.9 (247.9) | 53   | 526.6 (260.3) | 61   | 593.0 (282.3) | 63   | 607.4 (260.3) | 50   | 565.7 (200.1) | 275             | 566.1 (254.0) | 100.0 | 1290.0 |
| Sweet biscuits                  |                   |               |      |               |      |               |      |               |      |               |                 |               |       |        |
| Total                           | 390               | 259.9 (134.8) | 404  | 258.2 (131.7) | 377  | 280.0 (150.7) | 436  | 300.0 (477.2) | 429  | 282.1 (137.1) | 2036            | 276.5 (253.0) | 0.2   | 9800.0 |
| Branded labels                  | 310               | 273.9 (133.2) | 316  | 268.9 (131.4) | 312  | 287.7 (147.9) | 374  | 307.6 (511.7) | 356  | 286.4 (135.7) | 1668            | 285.8 (270.8) | 0.2   | 9800.0 |
| Private labels                  | 80                | 205.5 (127.6) | 88   | 219.9 (126.1) | 65   | 240.5 (159.3) | 62   | 253.8 (143.4) | 73   | 261.2 (143.1) | 368             | 234.3 (139.9) | 14.0  | 835.0  |
| Everyday sliced breads          |                   |               |      |               |      |               |      |               |      |               |                 |               |       |        |
| Total                           | 144               | 421.7 (70.4)  | 134  | 416.0 (63.0)  | 122  | 405.5 (51.8)  | 125  | 415.0 (54.5)  | 114  | 396.3 (70.9)  | 639             | 411.6 (63.2)  | 38.0  | 823.0  |
| Branded labels                  | 112               | 417.0 (75.7)  | 104  | 409.6 (66.6)  | 107  | 406.7 (53.3)  | 109  | 416.2 (56.3)  | 105  | 398.3 (73.3)  | 537             | 409.7 (65.8)  | 38.0  | 823.0  |
| Private labels                  | 32                | 438.1 (44.3)  | 30   | 438.3 (42.2)  | 15   | 397.2 (39.6)  | 16   | 406.3 (40.6)  | 9    | 373.3 (22.9)  | 102             | 421.4 (46.0)  | 343.0 | 542.7  |
| Other breads                    |                   |               |      |               |      |               |      |               |      |               |                 |               |       |        |
| Total                           | 260               | 446.7 (172.2) | 280  | 449.6 (160.3) | 244  | 445.6 (156.6) | 251  | 429.7 (143.8) | 254  | 415.3 (145.5) | 1289            | 437.6 (156.5) | 0.0   | 1380.0 |
| Branded labels                  | 195               | 438.2 (189.3) | 204  | 439.5 (169.7) | 197  | 442.8 (162.7) | 214  | 432.0 (142.2) | 223  | 421.0 (144.9) | 1033            | 434.3 (161.8) | 0.0   | 1380.0 |
| Private labels                  | 65                | 472.1 (102.7) | 76   | 476.6 (129.0) | 47   | 456.0 (129.4) | 37   | 417.0 (154.2) | 31   | 375.0 (146.0) | 256             | 450.7 (132.7) | 15.0  | 824.0  |
| Cakes/Muffins: ready-to-eat     |                   |               |      |               |      |               |      |               |      |               |                 |               |       |        |
| Total                           | 112               | 314.7 (143.0) | 125  | 280.7 (146.9) | 94   | 268.9 (135.2) | 105  | 288.5 (131.3) | 113  | 279.2 (145.3) | 546             | 286.8 (141.6) | 24.0  | 763.0  |
| Branded labels                  | 71                | 297.4 (144.3) | 93   | 273.6 (143.3) | 84   | 266.4 (128.6) | 91   | 288.9 (129.1) | 98   | 288.9 (138.9) | 434             | 282.6 (137.1) | 24.0  | 763.0  |
| Private labels                  | 41                | 344.6 (137.0) | 32   | 301.1 (157.7) | 10   | 289.9 (189.4) | 14   | 286.1 (150.1) | 15   | 216.2 (174.1) | 112             | 302.8 (157.4) | 81.0  | 684.0  |
| Breakfast cereals: ready-to-eat |                   |               |      |               |      |               |      |               |      |               |                 |               |       |        |
| Total                           | 262               | 203.6 (176.7) | 313  | 180.2 (168.9) | 293  | 177.5 (171.1) | 293  | 167.3 (160.6) | 321  | 167.2 (158.2) | 1482            | 178.4 (167.1) | 0.0   | 710.0  |
| Branded labels                  | 218               | 198.5 (172.8) | 260  | 168.7 (159.7) | 247  | 172.0 (163.4) | 258  | 166.2 (158.3) | 280  | 165.9 (155.1) | 1263            | 173.4 (161.6) | 0.0   | 710.0  |
| Private labels                  | 44                | 228.8 (194.9) | 53   | 236.8 (200.4) | 46   | 206.7 (207.2) | 35   | 175.5 (178.8) | 41   | 176.5 (180.3) | 219             | 207.7 (193.7) | 2.0   | 695.0  |
| Cereal bars                     |                   |               |      |               |      |               |      |               |      |               |                 |               |       |        |
| Total                           | 188               | 165.5 (104.4) | 229  | 142.4 (112.0) | 221  | 135.2 (103.7) | 215  | 131.5 (101.8) | 190  | 147.6 (104.4) | 1043            | 143.8 (105.9) | 3.0   | 670.0  |
| Branded labels                  | 153               | 165.8 (106.0) | 184  | 144.9 (116.8) | 181  | 136.7 (106.2) | 180  | 131.5 (103.7) | 156  | 152.0 (106.0) | 854             | 145.4 (108.4) | 3.0   | 670.0  |
| Private labels                  | 35                | 164.2 (98.3)  | 45   | 132.3 (90.1)  | 40   | 128.8 (92.6)  | 35   | 131.5 (92.4)  | 34   | 127.3 (95.5)  | 189             | 136.4 (93.6)  | 16.0  | 351.0  |
| Canned fish                     |                   |               |      |               |      |               |      |               |      |               |                 |               |       |        |
| Total                           | 242               | 394.4 (129.2) | 220  | 385.9 (145.4) | 226  | 397.6 (126.3) | 195  | 412.7 (152.1) | 190  | 403.6 (148.1) | 1073            | 398.3 (139.8) | 0.1   | 1668.0 |
| Branded labels                  | 167               | 402.1 (136.6) | 140  | 403.1 (157.9) | 149  | 416.9 (132.3) | 145  | 429.0 (163.8) | 149  | 423.5 (153.8) | 750             | 414.7 (148.9) | 0.1   | 1668.0 |
| Private labels                  | 75                | 377.5 (109.7) | 80   | 355.8 (115.4) | 77   | 360.3 (104.7) | 50   | 365.3 (98.4)  | 41   | 331.3 (96.0)  | 323             | 360.3 (106.9) | 59.0  | 600.0  |
| Nuts-salted                     |                   |               |      |               |      |               |      |               |      |               |                 |               |       |        |
| Total                           | 75                | 389.7 (242.5) | 104  | 400.6 (232.6) | 94   | 397.2 (226.0) | 101  | 374.8 (238.8) | 104  | 434.6 (293.5) | 478             | 400.1 (248.5) | 3.0   | 1470.0 |
| Branded labels                  | 47                | 390.1 (258.1) | 73   | 395.6 (231.7) | 65   | 397.5 (236.2) | 68   | 381.5 (264.2) | 73   | 459.6 (324.2) | 326             | 406.6 (266.1) | 3.0   | 1470.0 |
| Private labels                  | 28                | 389.1 (218.4) | 31   | 412.3 (238.3) | 29   | 396.3 (205.3) | 33   | 360.9 (178.2) | 31   | 375.6 (195.7) | 152             | 386.3 (205.6) | 12.0  | 1170.0 |
| Vegetables-canned               |                   |               |      |               |      |               |      |               |      |               |                 |               |       |        |
| Total                           | 255               | 216.2 (182.1) | 271  | 252.9 (346.2) | 277  | 220.2 (163.9) | 243  | 231.4 (203.8) | 241  | 200.3 (155.2) | 1287            | 224.7 (223.8) | 0.0   | 3700.0 |
| Branded labels                  | 186               | 233.6 (194.2) | 196  | 266.5 (309.3) | 201  | 240.4 (170.0) | 191  | 244.3 (217.4) | 181  | 221.9 (161.2) | 955             | 241.7 (217.8) | 0.0   | 3400.0 |
| Private labels                  | 69                | 169.2 (134.6) | 75   | 217.2 (428.2) | 76   | 166.7 (133.6) | 52   | 183.9 (134.8) | 60   | 135.3 (114.0) | 332             | 175.7 (233.7) | 1.0   | 3700.0 |
| Vegetables-pickled              |                   |               |      |               |      |               |      |               |      |               |                 |               |       |        |

|                                                  |     |                 |     |                 |     |                |     |                |     |                 |      |                 |       |         |
|--------------------------------------------------|-----|-----------------|-----|-----------------|-----|----------------|-----|----------------|-----|-----------------|------|-----------------|-------|---------|
| Total                                            | 156 | 1197.4 (1204.0) | 174 | 1163.6 (1082.2) | 197 | 998.8 (626.7)  | 218 | 1086.8 (943.2) | 206 | 1056.1 (964.9)  | 951  | 1094.1 (969.4)  | 5.0   | 12000.0 |
| Branded labels                                   | 137 | 1228.0 (1272.6) | 153 | 1195.9 (1137.7) | 181 | 100.7 (639.1)  | 191 | 1086.8 (992.6) | 177 | 1057.9 (1023.2) | 839  | 1105.1 (1017.6) | 5.0   | 12000.0 |
| Private labels                                   | 19  | 976.9 (433.5)   | 21  | 928.6 (477.5)   | 16  | 978.1 (479.5)  | 27  | 1086.4 (473.6) | 29  | 1044.9 (484.8)  | 112  | 1012.0 (466.7)  | 95.0  | 1780.0  |
| <b>Salamis, hams,bacon</b>                       |     |                 |     |                 |     |                |     |                |     |                 |      |                 |       |         |
| Total                                            | 329 | 1257.5 (537.0)  | 306 | 1237.1 (400.8)  | 320 | 1212.2 (490.1) | 337 | 1181.2 (373.1) | 307 | 1201.7 (431.8)  | 1599 | 1217.7 (451.1)  | 212.0 | 6850.0  |
| Branded labels                                   | 290 | 1273.3 (554.7)  | 265 | 1248.4 (410.0)  | 280 | 1217.1 (510.2) | 296 | 1183.2 (378.0) | 263 | 1204.3 (438.8)  | 1394 | 1225.1 (464.1)  | 212.0 | 6850.0  |
| Private labels                                   | 39  | 1140.3 (363.4)  | 41  | 1163.7 (330.0)  | 40  | 1177.4 (317.3) | 41  | 1166.5 (339.2) | 44  | 1185.9 (392.1)  | 205  | 1167.2 (347.0)  | 456.0 | 2830.0  |
| <b>Sausages, hotdogs</b>                         |     |                 |     |                 |     |                |     |                |     |                 |      |                 |       |         |
| Total                                            | 148 | 750.1 (171.3)   | 183 | 751.2 (178.4)   | 161 | 757.5 (168.5)  | 135 | 753.8 (152.5)  | 122 | 740.4 (183.3)   | 749  | 751.0 (171.0)   | 280.0 | 1667.0  |
| Branded labels                                   | 116 | 762.7 (174.6)   | 137 | 775.2 (174.7)   | 137 | 772.9 (169.8)  | 108 | 771.4 (155.7)  | 102 | 764.8 (187.0)   | 600  | 769.6 (172.0)   | 303.0 | 1667.0  |
| Private labels                                   | 32  | 704.6 (152.7)   | 46  | 679.5 (171.9)   | 24  | 674.6 (136.1)  | 27  | 683.3 (116.7)  | 20  | 616.0 (93.0)    | 149  | 676.3 (144.7)   | 280.0 | 1100.0  |
| <b>Raw of frozen meats with flavour/coated</b>   |     |                 |     |                 |     |                |     |                |     |                 |      |                 |       |         |
| Total                                            | 173 | 499.9 (225.9)   | 208 | 494.5 (222.3)   | 185 | 525.6 (206.7)  | 206 | 507.7 (211.1)  | 191 | 486.5 (203.8)   | 963  | 502.7 (214.0)   | 41.0  | 1620.0  |
| Branded labels                                   | 132 | 527.8 (230.8)   | 169 | 518.1 (225.6)   | 161 | 531.0 (210.3)  | 172 | 511.2 (218.2)  | 153 | 495.3 (204.3)   | 787  | 516.4 (217.6)   | 41.0  | 1620.0  |
| Private labels                                   | 41  | 410.0 (184.5)   | 39  | 392.2 (175.9)   | 24  | 489.0 (180.1)  | 34  | 490.1 (172.5)  | 38  | 451.1 (200.4)   | 176  | 441.2 (185.6)   | 51.0  | 900.0   |
| <b>Mayonnaise and salad dressings</b>            |     |                 |     |                 |     |                |     |                |     |                 |      |                 |       |         |
| Total                                            | 179 | 715.1 (418.7)   | 181 | 710.2 (377.4)   | 202 | 686.8 (412.2)  | 204 | 701.1 (418.2)  | 190 | 687.6 (426.4)   | 956  | 699.7 (410.6)   | 0.0   | 3000.0  |
| Branded labels                                   | 157 | 710.1 (440.3)   | 158 | 700.8 (388.9)   | 181 | 685.9 (430.7)  | 178 | 709.3 (441.7)  | 156 | 686.9 (452.4)   | 830  | 698.5 (430.6)   | 0.0   | 3000.0  |
| Private labels                                   | 22  | 750.7 (210.2)   | 23  | 774.7 (284.7)   | 21  | 694.3 (196.7)  | 26  | 645.0 (187.3)  | 34  | 690.6 (282.5)   | 126  | 707.7 (240.9)   | 274.0 | 1840.0  |
| <b>Pasta sauces</b>                              |     |                 |     |                 |     |                |     |                |     |                 |      |                 |       |         |
| Total                                            | 171 | 406.0 (208.4)   | 181 | 415.1 (224.1)   | 195 | 421.5 (247.8)  | 173 | 1137.0 (816.8) | 195 | 400.7 (232.2)   | 915  | 408.8 (228.6)   | 5.2   | 1600.0  |
| Branded labels                                   | 150 | 409.1 (214.5)   | 151 | 416.0 (231.0)   | 168 | 428.9 (259.6)  | 142 | 400.6 (233.1)  | 156 | 407.9 (242.7)   | 767  | 413.0 (236.9)   | 5.2   | 1600.0  |
| Private labels                                   | 21  | 384.0 (160.9)   | 30  | 410.3 (188.8)   | 27  | 375.6 (150.3)  | 31  | 397.2 (203.0)  | 39  | 371.9 (184.1)   | 148  | 387.4 (178.7)   | 40.0  | 1070.0  |
| <b>Savoury spreads and dips</b>                  |     |                 |     |                 |     |                |     |                |     |                 |      |                 |       |         |
| Total                                            | 276 | 521.8 (336.4)   | 311 | 506.7 (397.8)   | 311 | 519.3 (424.4)  | 350 | 492.2 (341.4)  | 337 | 489.0 (331.6)   | 1585 | 504.8 (367.5)   | 0.1   | 4300.0  |
| Branded labels                                   | 237 | 531.2 (357.3)   | 271 | 513.1 (422.7)   | 282 | 525.0 (442.2)  | 319 | 493.4 (354.7)  | 305 | 492.7 (344.8)   | 1414 | 509.7 (385.4)   | 0.1   | 4300.0  |
| Private labels                                   | 39  | 465.0 (149.1)   | 40  | 463.1 (135.4)   | 29  | 463.9 (168.1)  | 31  | 479.2 (150.0)  | 32  | 453.6 (157.6)   | 171  | 464.8 (149.6)   | 58.4  | 780.0   |
| <b>Peanut butter and other nut-based spreads</b> |     |                 |     |                 |     |                |     |                |     |                 |      |                 |       |         |
| Total                                            | 64  | 229.0 (178.3)   | 88  | 202.3 (172.6)   | 85  | 187.2 (163.1)  | 99  | 178.0 (160.7)  | 105 | 174.4 (154.5)   | 441  | 191.1 (165.1)   | 0.0   | 955.0   |
| Branded labels                                   | 48  | 213.7 (186.2)   | 64  | 179.7 (161.2)   | 63  | 176.4 (161.0)  | 77  | 161.9 (157.5)  | 80  | 163.8 (151.9)   | 332  | 176.0 (161.9)   | 0.0   | 955.0   |
| Private labels                                   | 16  | 275.1 (147.7)   | 24  | 262.4 (190.6)   | 22  | 218.0 (168.8)  | 22  | 234.0 (162.9)  | 25  | 208.4 (160.7)   | 109  | 237.2 (166.8)   | 5.0   | 500.0   |
| <b>Crisps and salty snacks</b>                   |     |                 |     |                 |     |                |     |                |     |                 |      |                 |       |         |
| Total                                            | 226 | 674.0 (305.1)   | 250 | 664.1 (332.8)   | 253 | 642.5 (348.1)  | 252 | 590.4 (297.0)  | 251 | 624.5 (357.2)   | 1232 | 638.4 (330.1)   | 0.0   | 3000.0  |
| Branded labels                                   | 186 | 663.2 (299.4)   | 203 | 651.9 (331.9)   | 210 | 639.9 (351.8)  | 217 | 579.5 (287.2)  | 216 | 625.1 (365.4)   | 1032 | 630.7 (329.8)   | 0.0   | 3000.0  |
| Private labels                                   | 40  | 724.1 (329.4)   | 47  | 717.0 (335.2)   | 43  | 655.1 (332.7)  | 35  | 658.0 (347.7)  | 35  | 621.2 (306.5)   | 200  | 678.0 (330.0)   | 175.0 | 1700.0  |

SD: Standard deviation; Min: minimum; Max: maximum. Number of missing for sodium (n, 2015-19): Savoury biscuits (13); Sweet biscuits (66); Everyday sliced breads (18); Other breads (33); Cakes/Muffins: ready-to-eat (19); Breakfast cereals: ready-to-eat (12); Cereal bars (7); Canned fish (27); Nuts-salted (9); Vegetables-canned (19); Vegetables-pickled (25); Processed meats-I (17); Processed meats-II (11); Processed meats-III (9); Mayonnaise and salad dressings (14); Pasta sauces (11); Spreads-I-Savoury (16); Spreads-II-peanut butter and other nut-based spreads (1); Crisps and snacks (9).

**Table S4.** Sugar content within the selected food categories: mean (SD) from 2015-2019- in total, for branded and private labels.

| Food categories                 | Sugar (g/100 g) |            |      |            |      |            |      |            |      |            |                 |            |      |      |
|---------------------------------|-----------------|------------|------|------------|------|------------|------|------------|------|------------|-----------------|------------|------|------|
|                                 | 2015            |            | 2016 |            | 2017 |            | 2018 |            | 2019 |            | Total-2015-2019 |            |      |      |
|                                 | n               | Mean (SD)  | n    | Mean (SD)  | n    | Mean (SD)  | n    | Mean (SD)  | n    | Mean (SD)  | n               | Mean (SD)  | Min  | Max  |
| Savoury biscuits                |                 |            |      |            |      |            |      |            |      |            |                 |            |      |      |
| Total                           | 308             | 3.0(3.2)   | 304  | 2.9(3.3)   | 315  | 3.0(3.5)   | 344  | 3.4(4.2)   | 345  | 3.4(4.1)   | 1616            | 3.2(3.7)   | 0.0  | 47.0 |
| Branded labels                  | 260             | 3.0(2.8)   | 251  | 2.9(3.0)   | 254  | 2.9(3.1)   | 281  | 3.4(4.1)   | 295  | 3.4(4.3)   | 1341            | 3.1(3.5)   | 0.0  | 25.0 |
| Private labels                  | 48              | 3.5(4.9)   | 53   | 3.1(4.7)   | 61   | 3.3(4.8)   | 63   | 3.8(4.5)   | 50   | 3.0(2.5)   | 275             | 3.4(4.4)   | 0.0  | 32.4 |
| Sweet biscuits                  |                 |            |      |            |      |            |      |            |      |            |                 |            |      |      |
| Total                           | 396             | 32.6(10.3) | 410  | 32.6(9.5)  | 373  | 33.3(9.9)  | 433  | 33.1(11.1) | 429  | 32.9(10.9) | 2041            | 32.9(10.4) | 0.5  | 77.0 |
| Branded labels                  | 315             | 32.4(10.5) | 322  | 32.7(9.7)  | 308  | 33.5(9.9)  | 371  | 33.1(11.4) | 356  | 32.9(11.2) | 1672            | 33.0(10.6) | 0.5  | 77.0 |
| Private labels                  | 81              | 33.8(9.3)  | 88   | 32.3(9.1)  | 65   | 32.7(10.1) | 62   | 33.2(9.0)  | 73   | 33.1(9.6)  | 369             | 33.0(9.4)  | 3.0  | 63.0 |
| Everyday sliced breads          |                 |            |      |            |      |            |      |            |      |            |                 |            |      |      |
| Total                           | 147             | 2.7(1.1)   | 134  | 2.7(1.1)   | 122  | 2.8(1.0)   | 126  | 3.0(1.1)   | 114  | 2.8(1.0)   | 643             | 2.8(1.1)   | 0.0  | 7.8  |
| Branded labels                  | 115             | 2.8(1.1)   | 104  | 2.8(1.0)   | 107  | 2.7(1.1)   | 110  | 2.9(1.1)   | 105  | 2.8(1.0)   | 541             | 2.8(1.1)   | 0.0  | 7.8  |
| Private labels                  | 32              | 2.3(1.2)   | 30   | 2.2(1.2)   | 15   | 3.3(0.5)   | 16   | 3.3(0.5)   | 9    | 3.2(0.8)   | 102             | 2.7(1.1)   | 0.3  | 4.6  |
| Other breads                    |                 |            |      |            |      |            |      |            |      |            |                 |            |      |      |
| Total                           | 265             | 3.1(3.3)   | 287  | 3.2(3.8)   | 248  | .2(3.4)    | 255  | 2.9(2.5)   | 256  | 2.8(2.0)   | 1311            | 3.0(3.1)   | 0.0  | 43.2 |
| Branded labels                  | 200             | 3.1(2.6)   | 211  | 3.3(3.9)   | 201  | 3.3(3.6)   | 218  | 3.0(2.7)   | 225  | 2.8(2.0)   | 1055            | 3.1(3.0)   | 0.0  | 43.2 |
| Private labels                  | 65              | 3.2(4.8)   | 76   | 2.9(3.4)   | 47   | 2.7(2.1)   | 37   | 2.6(1.7)   | 31   | 2.6(1.5)   | 256             | 2.9(3.3)   | 0.1  | 27.4 |
| Cakes/Muffins: ready-to-eat     |                 |            |      |            |      |            |      |            |      |            |                 |            |      |      |
| Total                           | 115             | 34.0(13.6) | 123  | 32.9(13.4) | 94   | 31.9(13.1) | 104  | 32.1(13.2) | 113  | 30.7(12.5) | 549             | 32.3(13.1) | 3.0  | 76.7 |
| Branded labels                  | 74              | 32.0(13.3) | 93   | 32.2(13.9) | 84   | 31.3(12.6) | 90   | 31.2(12.7) | 98   | 30.5(12.3) | 439             | 31.4(12.9) | 4.2  | 76.7 |
| Private labels                  | 41              | 36.3(14.0) | 30   | 34.9(11.5) | 10   | 36.6(16.4) | 14   | 38.1(14.9) | 15   | 31.6(13.9) | 110             | 35.5(13.6) | 3.0  | 74.5 |
| Breakfast cereals: ready-to-eat |                 |            |      |            |      |            |      |            |      |            |                 |            |      |      |
| Total                           | 265             | 18.8(8.9)  | 317  | 18.0(8.6)  | 293  | 17.3(8.7)  | 293  | 17.1(8.1)  | 316  | 17.2(8.1)  | 1484            | 17.7(8.5)  | 0.0  | 54.6 |
| Branded labels                  | 220             | 18.5(8.2)  | 263  | 17.7(8.2)  | 247  | 16.9(8.1)  | 258  | 17.0(8.0)  | 275  | 17.2(8.1)  | 1263            | 17.4(8.1)  | 0.0  | 41.3 |
| Private labels                  | 45              | 20.3(11.8) | 54   | 19.5(10.6) | 46   | 19.8(11.0) | 35   | 18.1(9.1)  | 41   | 17.6(8.3)  | 221             | 19.1(10.3) | 2.0  | 54.6 |
| Cereal bars                     |                 |            |      |            |      |            |      |            |      |            |                 |            |      |      |
| Total                           | 188             | 27.7(7.0)  | 229  | 26.5(7.0)  | 221  | 26.2(7.8)  | 215  | 25.6(8.1)  | 190  | 25.7(9.1)  | 1043            | 26.3(7.8)  | 1.5  | 76.1 |
| Branded labels                  | 153             | 28.1(6.8)  | 184  | 26.2(7.3)  | 181  | 26.0(8.2)  | 180  | 25.3(8.5)  | 156  | 25.4(9.7)  | 854             | 26.2(8.2)  | 1.5  | 76.1 |
| Private labels                  | 35              | 25.8(7.7)  | 45   | 27.4(5.3)  | 40   | 27.0(5.7)  | 35   | 27.1(5.0)  | 34   | 27.0(4.9)  | 189             | 26.9(5.8)  | 6.8  | 40.7 |
| Ice-cream                       |                 |            |      |            |      |            |      |            |      |            |                 |            |      |      |
| Total                           | 272             | 23.4(4.8)  | 318  | 23.4(4.7)  | 308  | 22.6(4.7)  | 340  | 22.4(5.1)  | 365  | 22.0(5.9)  | 1603            | 22.7(5.1)  | 1.0  | 53.6 |
| Branded labels                  | 248             | 23.5(4.9)  | 288  | 23.5(4.8)  | 274  | 22.6(4.9)  | 313  | 22.3(5.3)  | 340  | 22.0(6.1)  | 1463            | 22.7(5.3)  | 1.0  | 53.6 |
| Private labels                  | 24              | 22.8(3.1)  | 30   | 22.8(2.6)  | 34   | 22.7(2.8)  | 27   | 23.4(3.1)  | 25   | 23.1(3.3)  | 140             | 23.0(2.9)  | 18.9 | 30.3 |
| Fruit- canned in syrup/juice    |                 |            |      |            |      |            |      |            |      |            |                 |            |      |      |
| Total                           | 167             | 13.4(5.4)  | 151  | 14.1(5.4)  | 151  | 13.9(5.4)  | 134  | 13.5(6.1)  | 138  | 12.6(4.7)  | 741             | 13.5(5.4)  | 0.2  | 53.9 |
| Branded labels                  | 95              | 13.196(3)  | 78   | 14.0(6.7)  | 75   | 14.2(6.4)  | 67   | 14.1(7.4)  | 71   | 13.4(5.5)  | 386             | 13.7(6.5)  | 0.2  | 53.9 |
| Private labels                  | 72              | 13.693(7)  | 73   | 14.2(3.7)  | 76   | 13.6(4.0)  | 67   | 13.0(4.5)  | 67   | 11.7(3.7)  | 355             | 13.3(4.0)  | 1.6  | 22.3 |
| Mayonnaise and salad dressings  |                 |            |      |            |      |            |      |            |      |            |                 |            |      |      |
| Total                           | 175             | 12.2(13.1) | 177  | 10.6(11.0) | 198  | 12.5(13.3) | 201  | 11.4(11.8) | 188  | 11.4(12.0) | 939             | 11.6(12.3) | 0.0  | 90.0 |
| Branded labels                  | 153             | 12.6(13.7) | 154  | 10.5(11.5) | 177  | 12.7(13.8) | 175  | 11.8(12.5) | 154  | 11.8(12.9) | 813             | 11.9(12.9) | 0.0  | 90.0 |
| Private labels                  | 22              | 9.8(6.7)   | 23   | 11.5(6.9)  | 21   | 10.4(7.0)  | 26   | 9.1(5.7)   | 34   | 10.0(6.4)  | 126             | 10.1(6.5)  | 0.0  | 26.6 |
| Pasta sauces                    |                 |            |      |            |      |            |      |            |      |            |                 |            |      |      |

|                                                  |     |            |     |            |     |            |     |            |     |            |      |            |     |      |
|--------------------------------------------------|-----|------------|-----|------------|-----|------------|-----|------------|-----|------------|------|------------|-----|------|
| Total                                            | 172 | 4.3(2.2)   | 181 | 4.4(2.1)   | 195 | 4.4(2.2)   | 172 | 4.6(2.2)   | 190 | 4.4(2.1)   | 910  | 4.4(2.2)   | 0.0 | 12.0 |
| Branded labels                                   | 150 | 4.2(2.2)   | 151 | 4.4(2.1)   | 168 | 4.3(2.1)   | 141 | 4.5(2.2)   | 151 | 4.4(2.1)   | 761  | 4.3(2.1)   | 0.0 | 12.0 |
| Private labels                                   | 22  | 4.9(2.3)   | 30  | 4.9(2.2)   | 27  | 5.0(2.5)   | 31  | 5.0(2.5)   | 39  | 4.5(2.1)   | 149  | 4.8(2.3)   | 1.0 | 8.8  |
| <b>Savoury spread and dips</b>                   |     |            |     |            |     |            |     |            |     |            |      |            |     |      |
| Total                                            | 276 | 12.9(14.3) | 312 | 15.5(15.8) | 311 | 14.0(13.9) | 350 | 13.4(13.7) | 334 | 12.0(13.8) | 1583 | 13.5(14.3) | 0.0 | 81.0 |
| Branded labels                                   | 238 | 12.9(14.8) | 272 | 15.5(16.2) | 282 | 14.0(14.3) | 319 | 13.5(14.1) | 302 | 12.3(14.2) | 1413 | 13.6(14.7) | 0.0 | 81.0 |
| Private labels                                   | 38  | 13.2(10.6) | 40  | 15.2(12.5) | 29  | 13.8(9.8)  | 31  | 12.7(9.7)  | 32  | 9.0(9.0)   | 170  | 12.9(10.6) | 0.5 | 54.5 |
| <b>Peanut butter and other nut-based spreads</b> |     |            |     |            |     |            |     |            |     |            |      |            |     |      |
| Total                                            | 63  | 6.7(7.1)   | 88  | 7.7(9.8)   | 84  | 5.3(2.8)   | 98  | 5.6(3.2)   | 105 | 5.8(3.1)   | 438  | 6.2(5.8)   | 0.5 | 60.0 |
| Branded labels                                   | 47  | 5.4(2.6)   | 64  | 6.6(7.5)   | 62  | 5.2(2.5)   | 76  | 5.5(3.1)   | 80  | 5.9(3.1)   | 329  | 5.7(4.2)   | 0.5 | 60.0 |
| Private labels                                   | 16  | 10.6(13.0) | 24  | 10.8(14.0) | 22  | 5.8(3.4)   | 22  | 6.0(3.5)   | 25  | 5.6(3.1)   | 109  | 7.6(8.8)   | 1.0 | 56.8 |

SD: Standard deviation; Min: minimum; Max: maximum. Number of missing for sugar (2015-19): Savoury biscuits (6); Sweet biscuits (61); Everyday sliced breads (14); Other breads (11);

Cakes/Muffins: ready-to-eat (16); Breakfast cereals: ready-to-eat (10); Cereal bars (7); Ice-cream (9); Fruit- canned in syrup/juice (3); Mayonnaise and salad dressings (31); Pasta sauces (16); Spreads-I-Savoury (18); Spreads-II-peanut butter and other nut-based spreads (4).
